# Supplementary material for: Plasma interleukin 6 levels are associated with cardiac function after ST-elevation myocardial infarction
Source: Springer Nature journal article supplement (doi:10.1007/s00392-018-1387-z), 2018-10-26
Supplement: MOESM2 [file 16228094]

**A**

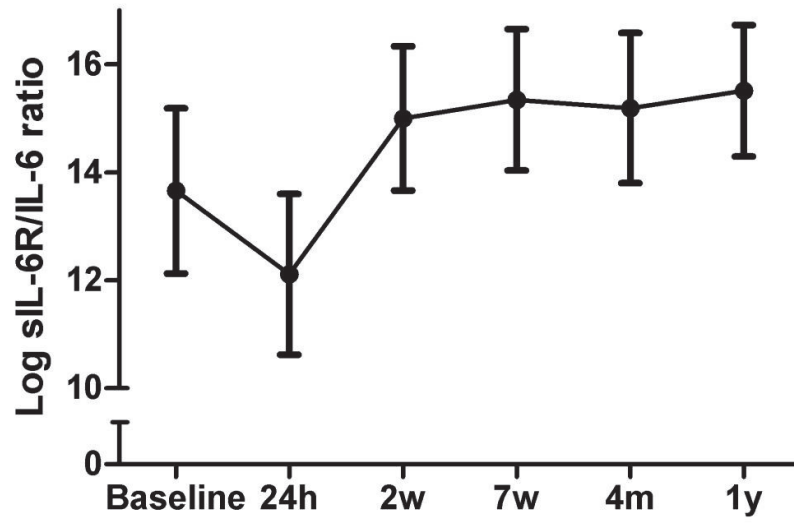

**B**

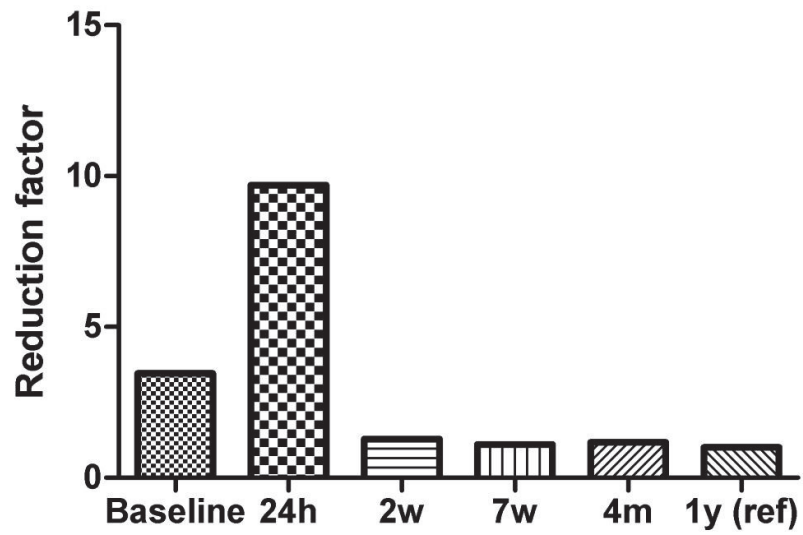

Supplementary Figure 1

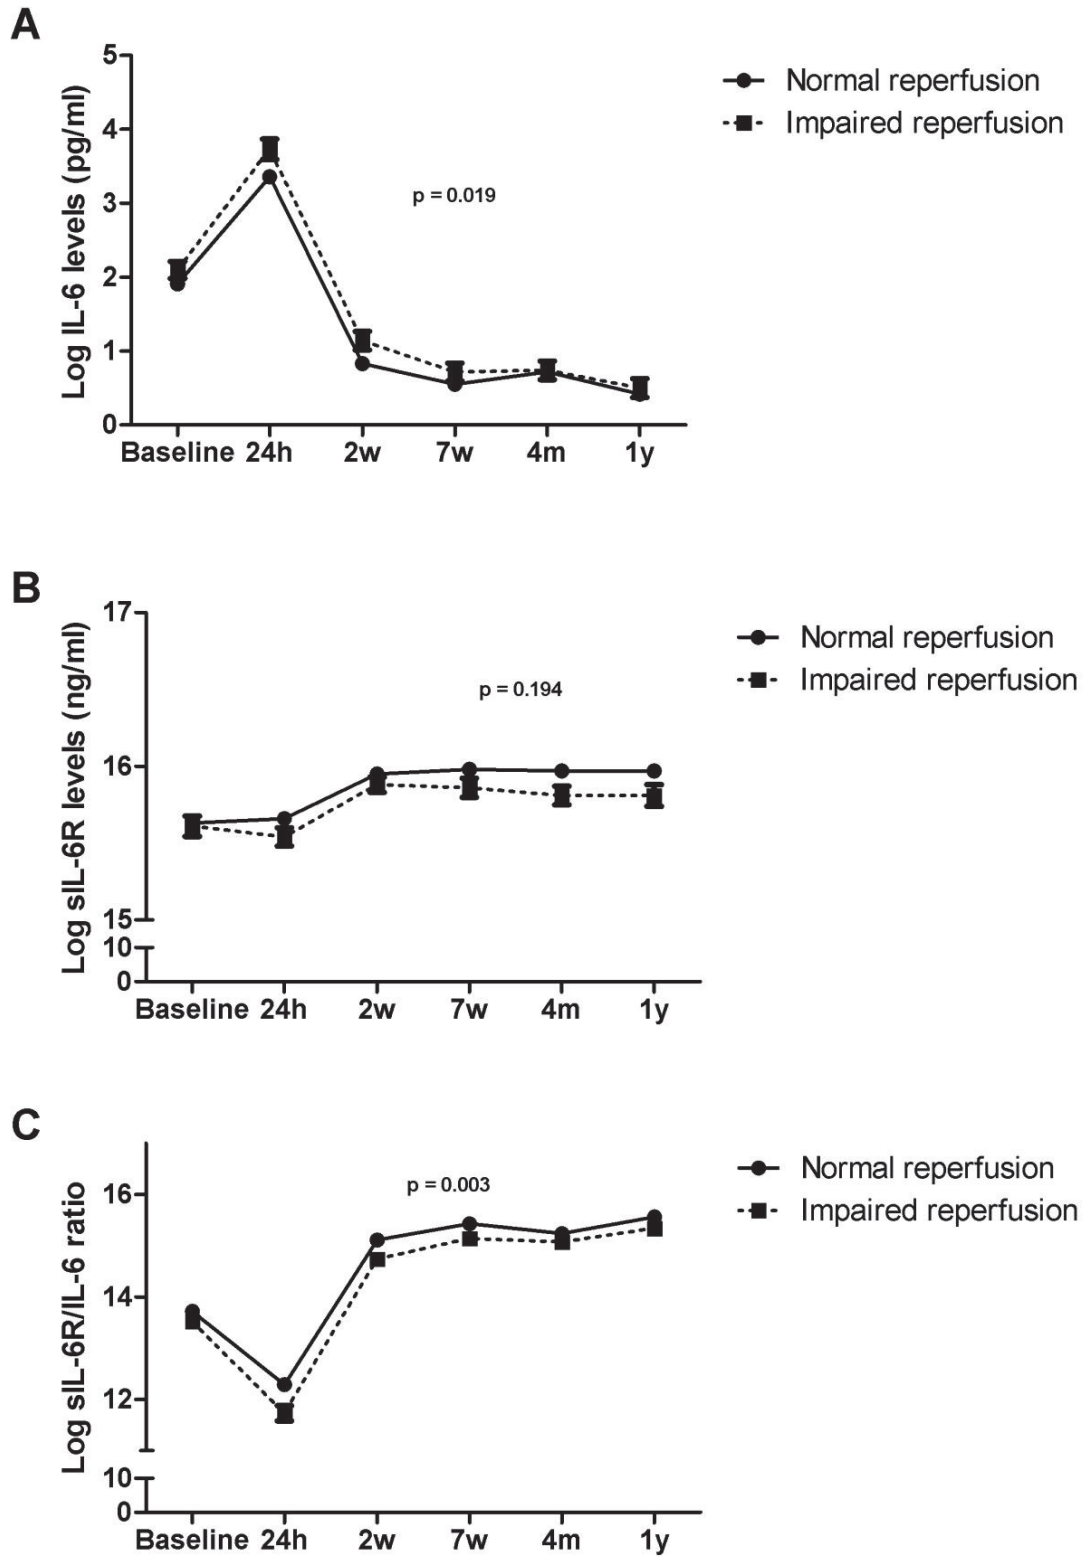

Supplementary Figure 2

**A**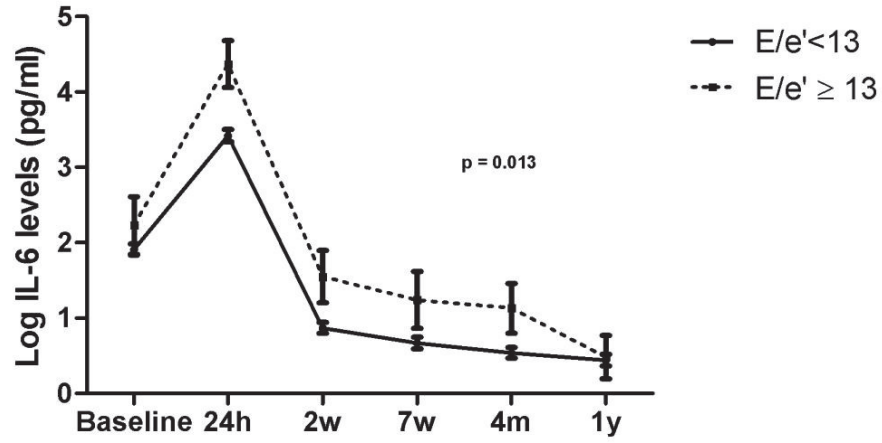**B**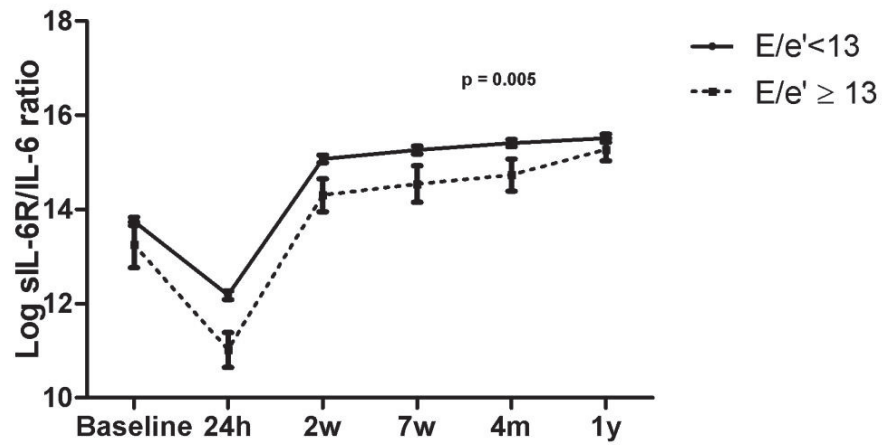

Supplementary Figure 3

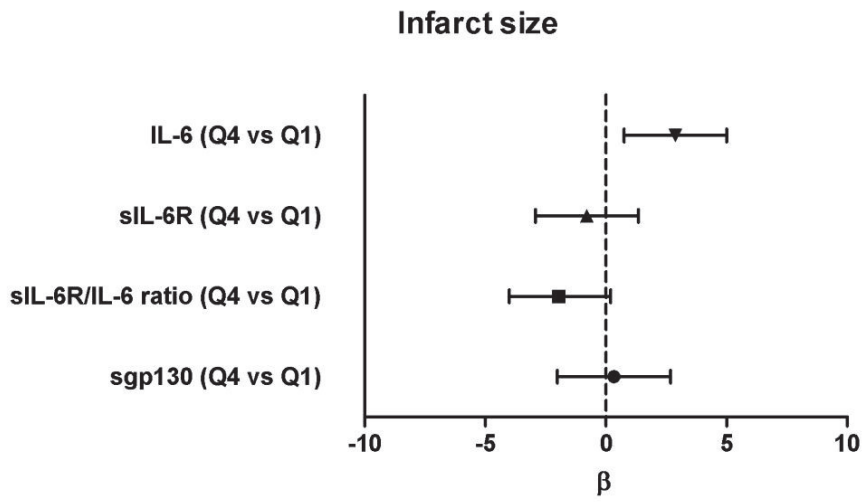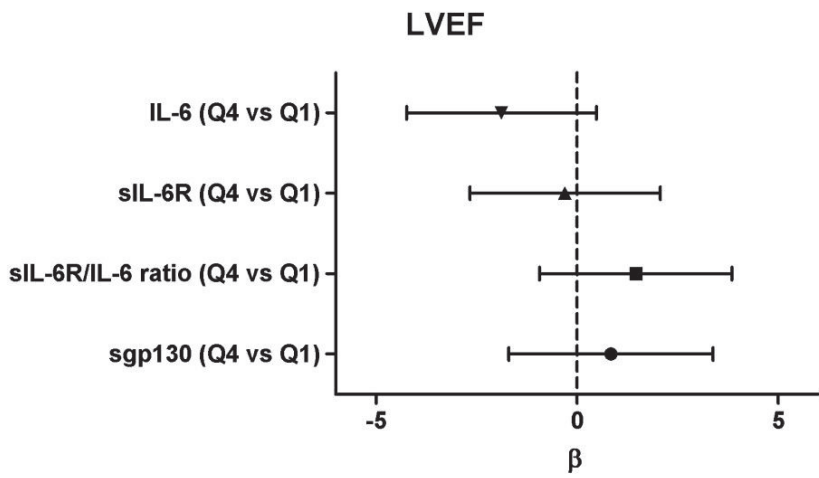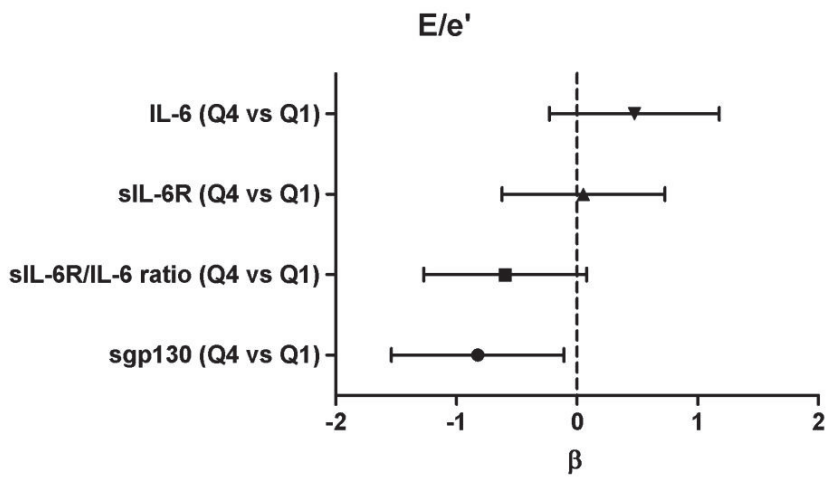

Supplementary Figure 4
